# Supplementary material for: Functional analysis of CASK transcript variants expressed in human brain
Source: PubMed Central journal article supplement (PMC8208546; doi:10.1371/journal.pone.0253223), 2021-06-16
Supplement: pone.0253223.s001.pdf [file pone.0253223.s001.pdf]

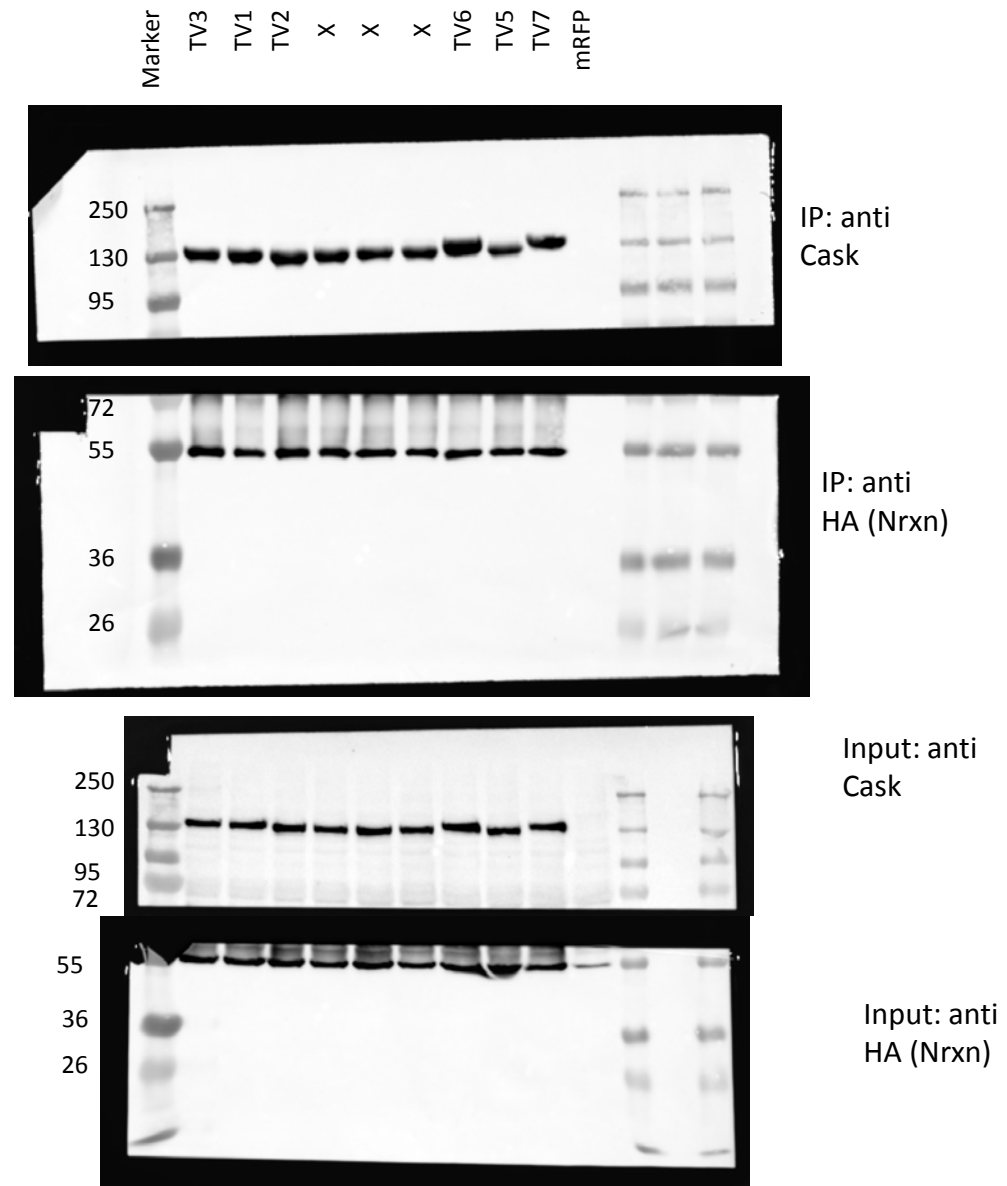

Fig. 2A. Cells transfected with mRFP-tagged CASK variants and HA-tagged Nrnx1

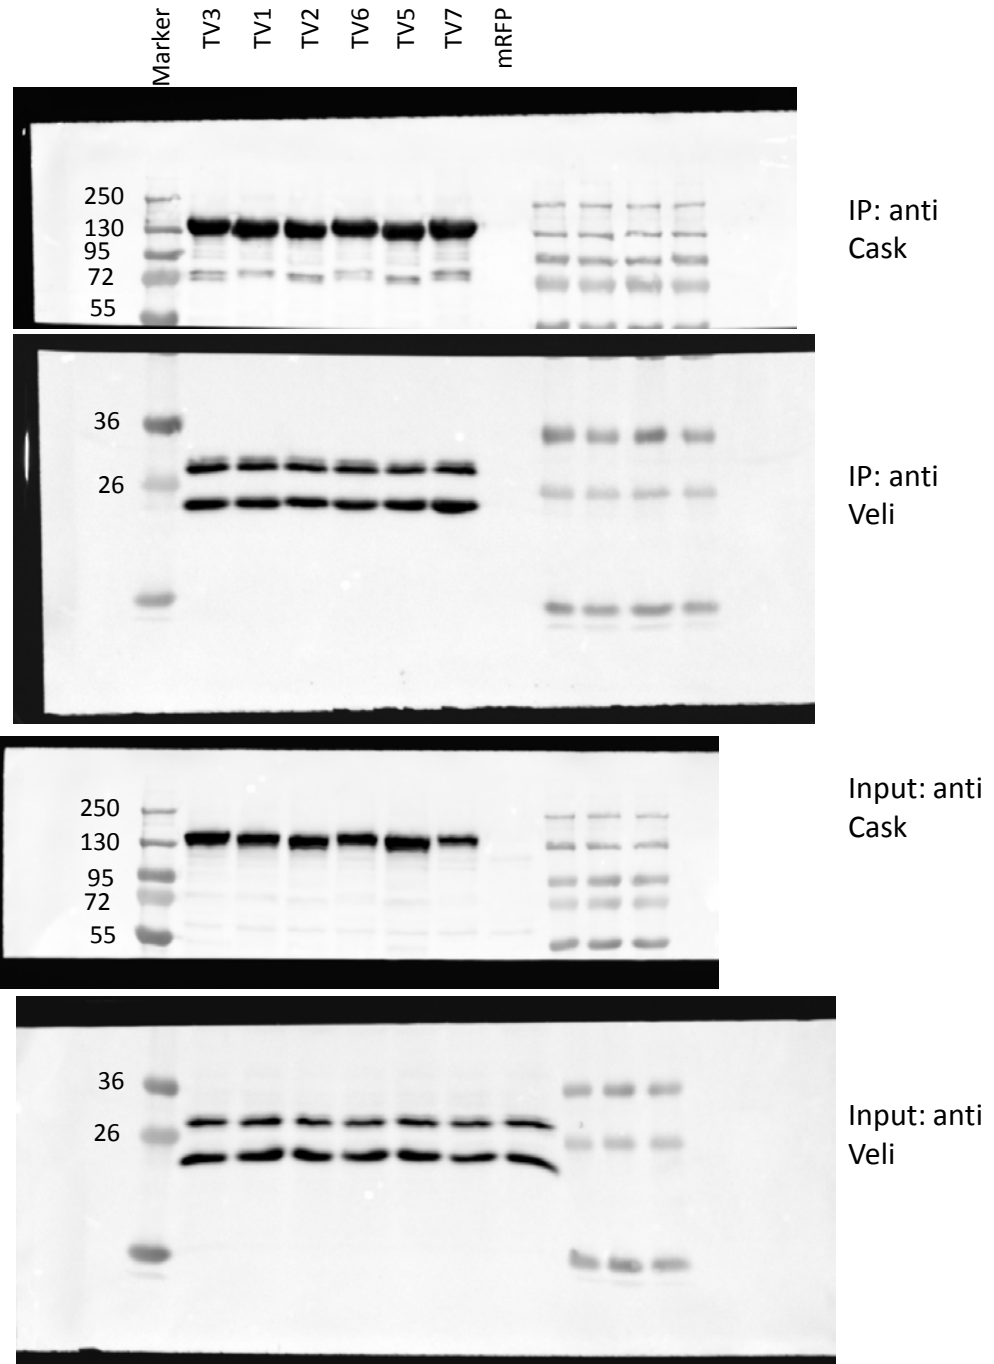

Fig. 3A. Cells transfected with mRFP-tagged CASK variants

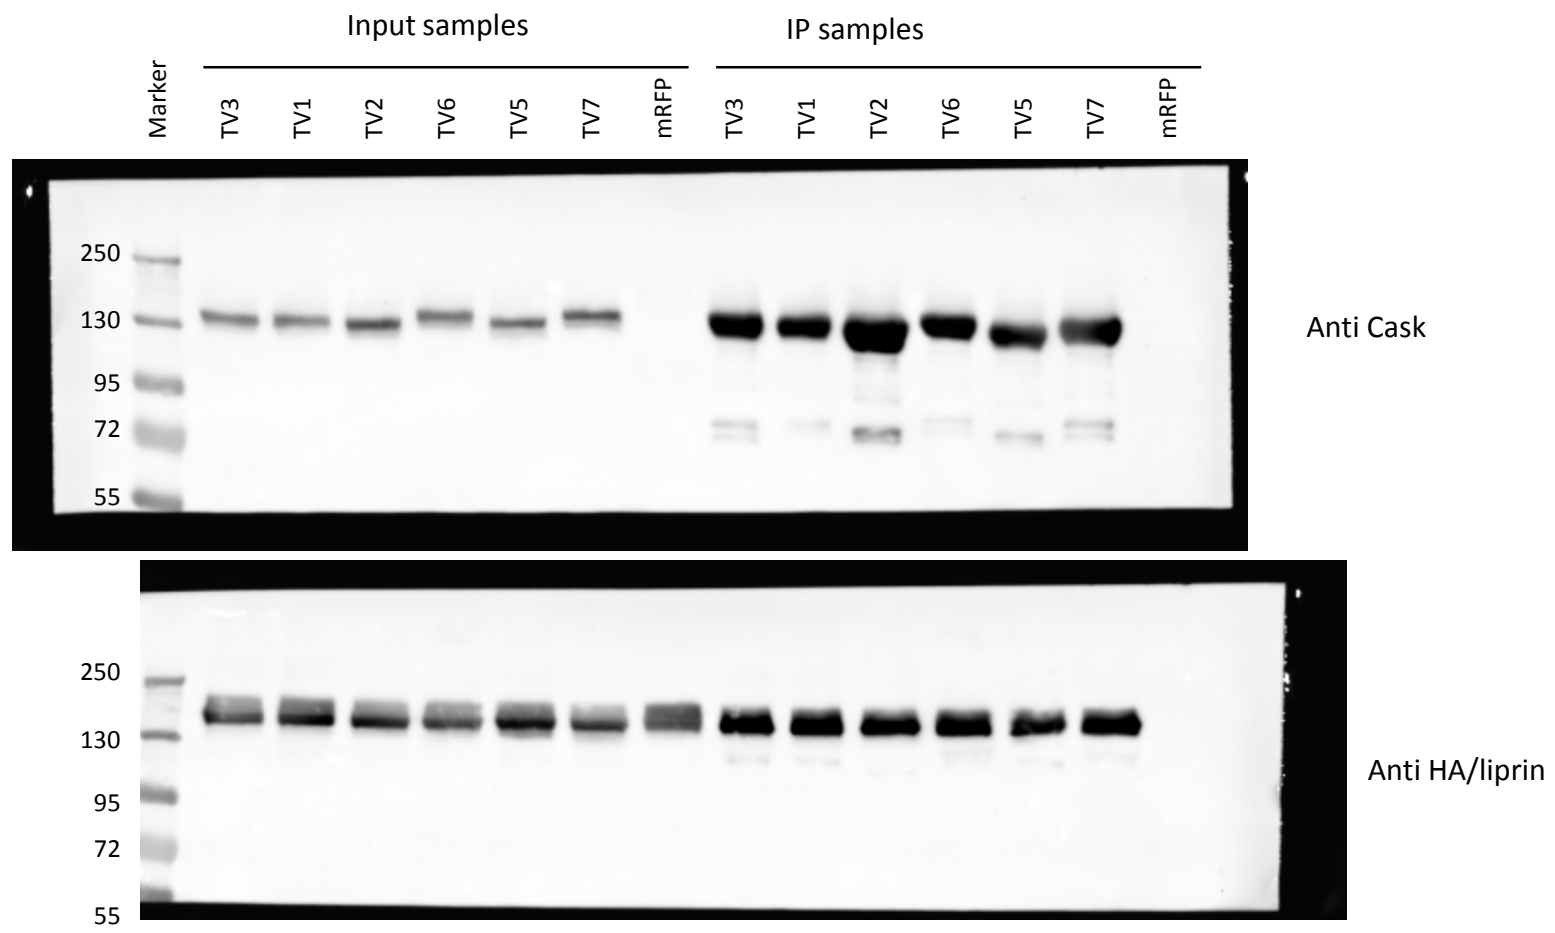

Fig. 4A. Cells transfected with mRFP-tagged CASK variants and HA-tagged liprin

Marker TV3 TV1 TV2 X X X TV6 TV5 TV7 mRFP

250  
130  
95  
72

antiCask  
IP

Marker TV3 TV1 TV2 X X X TV6 TV5 TV7 mRFP

250  
130  
95  
72

antiCask  
Input

250  
130  
95  
72  
55  
36  
26

AntiMyc  
(Tbr1)  
IP

Marker TV3 TV1 TV2 X X X TV6 TV5 TV7 mRFP

250  
130  
95  
72

AntiMyc  
(Tbr1)  
Input

Fig. 5A. Cells transfected with mRFP-tagged CASK variants and myc-tagged Tbr1

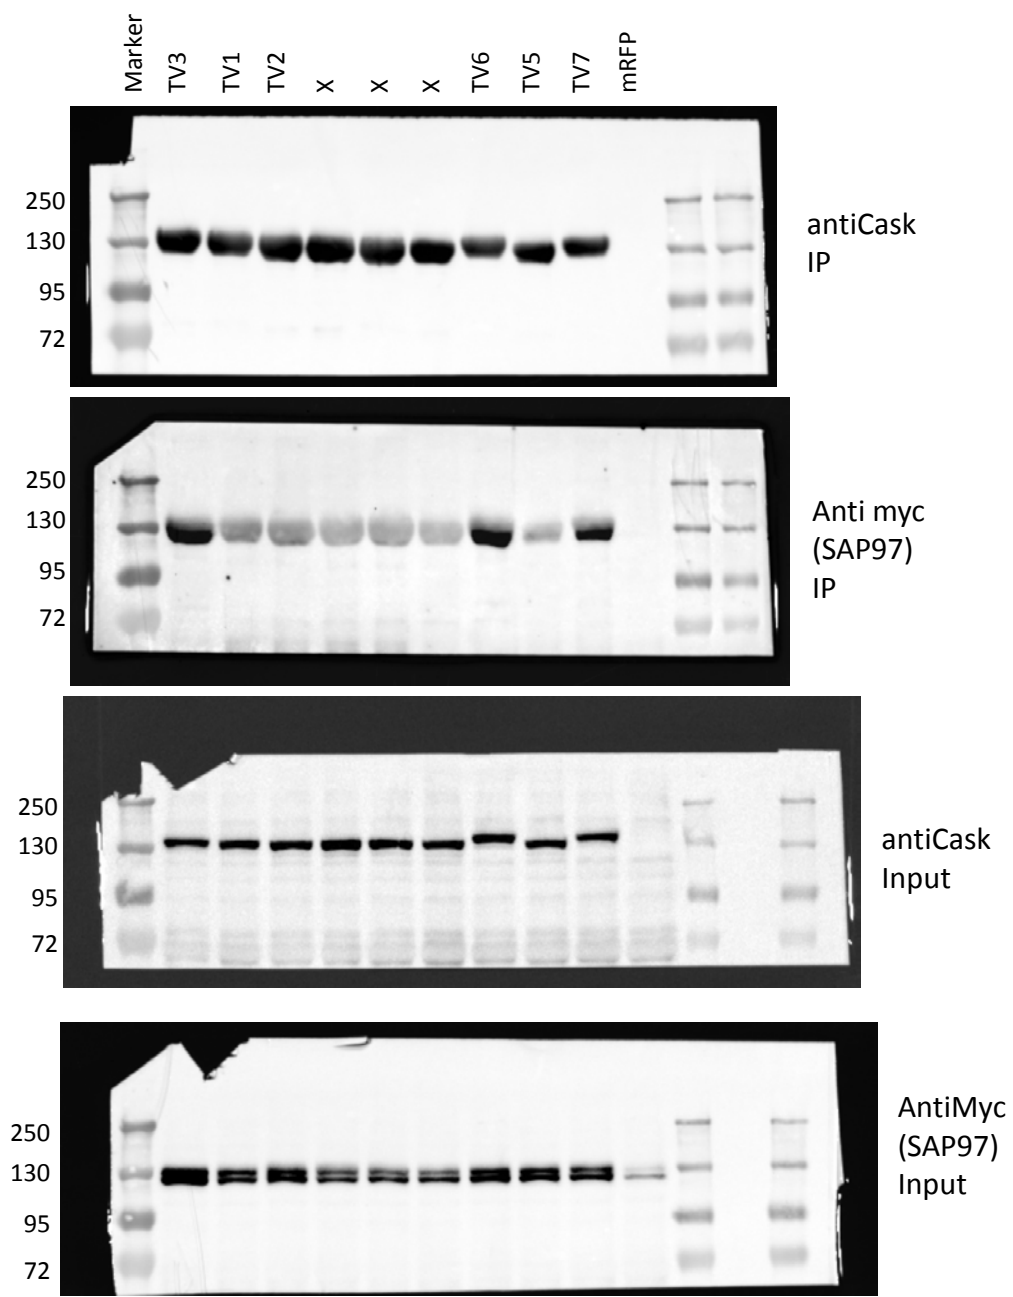

Fig. 7A. Cells transfected with mRFP-tagged CASK variants and myc-tagged SAP97

Marker TV3 TV1 TV2 TV6 TV5 TV7 mRFP

250  
130  
95  
72  
55

antiCask  
IP

Marker TV3 TV1 TV2 TV6 TV5 TV7 mRFP

250  
130  
95  
72  
55

antiCask  
Input

250  
130  
95  
72  
55  
36

Anti SAP97  
IP

250  
130  
95  
72  
55  
36  
26

Anti SAP97  
Input

Fig. 8A. Cells transfected with mRFP-tagged CASK variants
